# Supplementary material for: Influenza A and B Viruses in Fine Aerosols of Exhaled Breath Samples from Patients in Tropical Singapore
Source: MDPI journal article supplement (doi:10.3390/v15102033), 2023-09-30
Supplement: s1 [file s1]

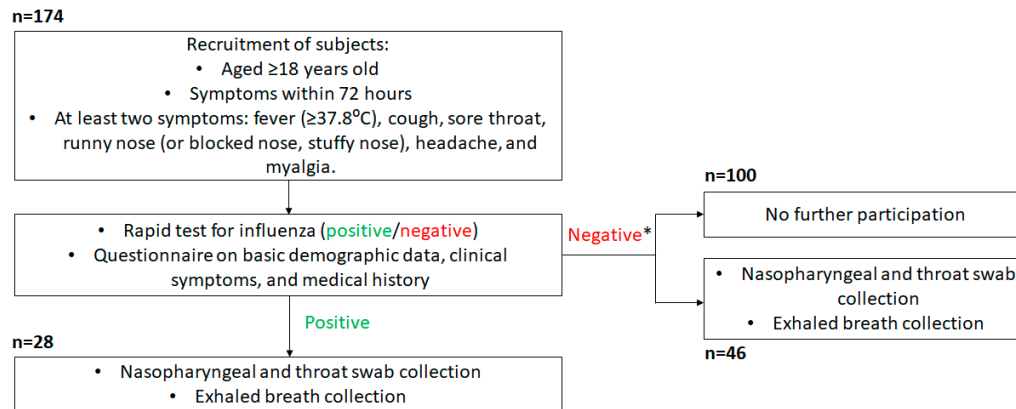

\*: a small portion of rapid test negative subjects were invited to provide exhaled breath samples to account for false negatives of the rapid test

**Supplementary Figure S1.** Study workflow of subject recruitment, sampling and laboratory assays.
